# Supplementary material for: Interplay between copy number alterations and immune profiles in the early breast cancer Scandinavian Breast Group 2004-1 randomized phase II trial: results from a feasibility study
Source: PubMed Central journal article supplement (PMC8604966; doi:10.1038/s41523-021-00352-3), 2021-11-19
Supplement: 41523_2021_352_MOESM2_ESM.pdf [file 41523_2021_352_MOESM2_ESM.pdf]

## **Supplementary Material**

### **Supplementary Figure Legends**

**Supplementary Figure 1.** Mean cell densities of immune cell subpopulations (A) and their co-expression with immune checkpoints (B) in ER-positive and ER-negative tumors

**Supplementary Figure 2.** Heatmaps of clusters of immune cell subpopulations derived from multiplex IHC using unsupervised hierarchical clustering in stroma (A) and tumor (B) compartments

**Supplementary Figure 3.** CUTseq experimental replicates' concordance

**Supplementary Figure 4.** Percentage (A) and size (B) of the altered genome (amplified or deleted) in ER-positive and ER-negative tumors. In the boxplots, each box extends from the 25th to the 75th percentile, the midline represents the median, and the whiskers extend from  $-1.5 \times \text{IQR}$  to  $+1.5 \times \text{IQR}$  from the closest quartile, where IQR is the inter-quartile range

### **Supplementary Tables**

**Supplementary Table 1.** Cell densities (cells/mm<sup>2</sup>) of the different immune cell subsets as derived from the multiplex fluorescent IHC method

**Supplementary Table 2.** Correlation matrix values for the different immune cell subsets

**Supplementary Table 3.** Patient characteristics per manual TILs group in the SBG-2004-1 study cohort

**Supplementary Table 4.** Variables derived from the digital TILs evaluation

**Supplementary Table 5.** List of antibodies used for the multiplex fluorescent IHC method

**Supplementary Data 1.** Segmented Somatic Copy Number Alterations profiles by CUTseq

# Supplementary Figure 1

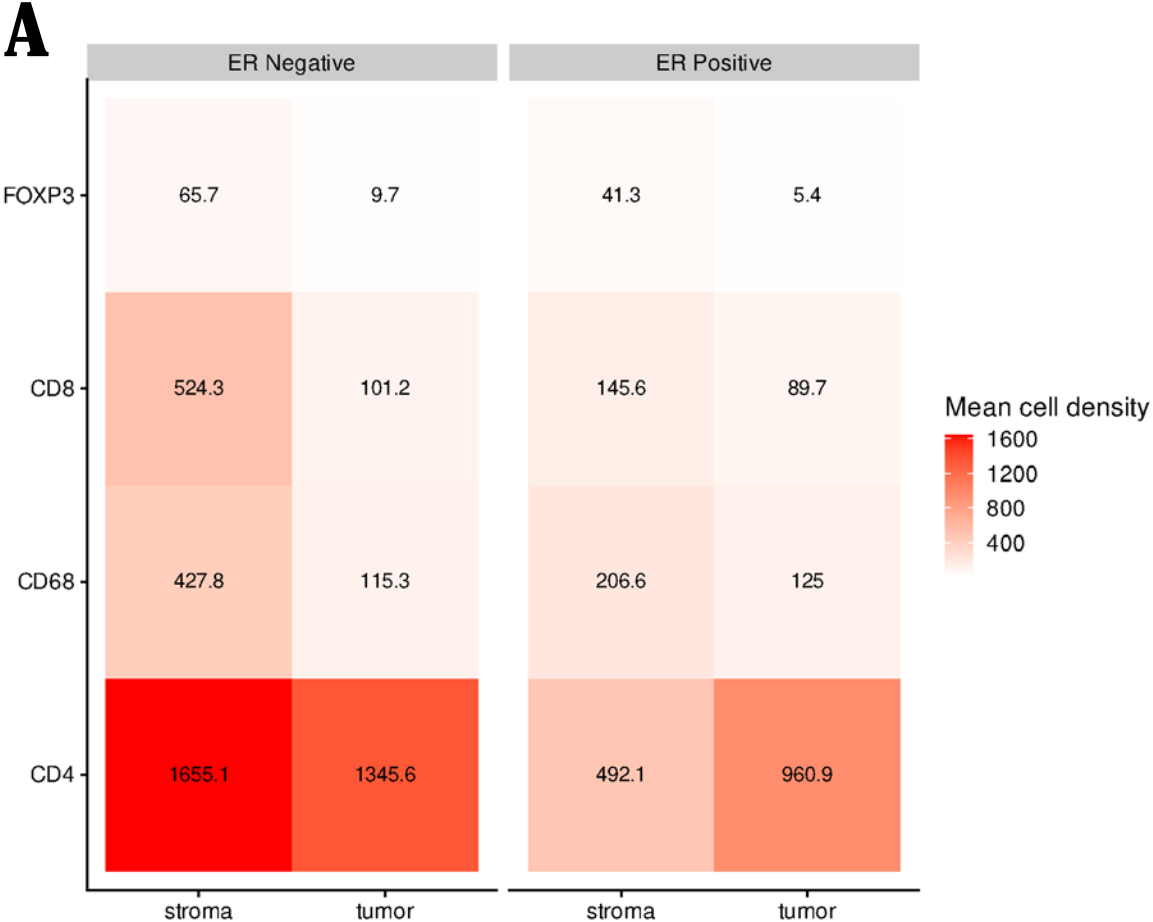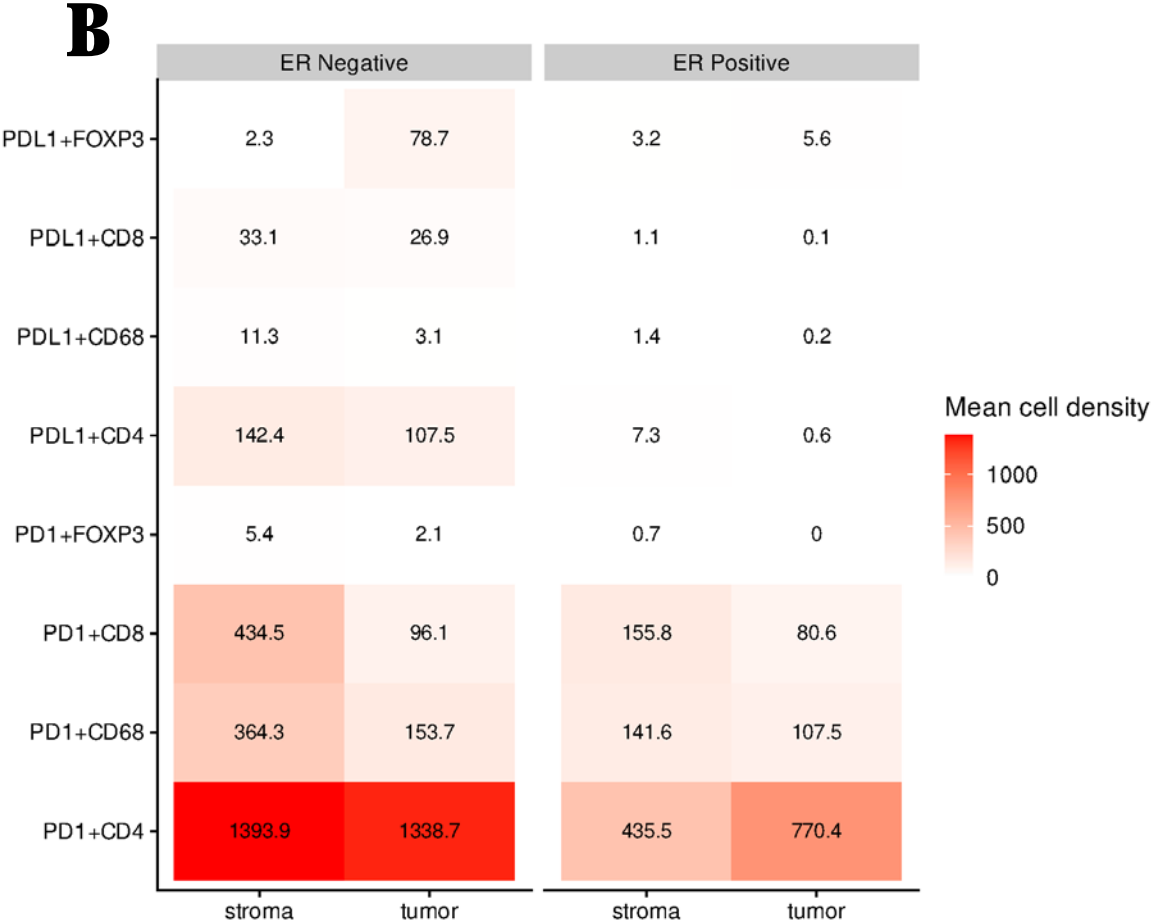

# Supplementary Figure 2

## A) Stroma compartment

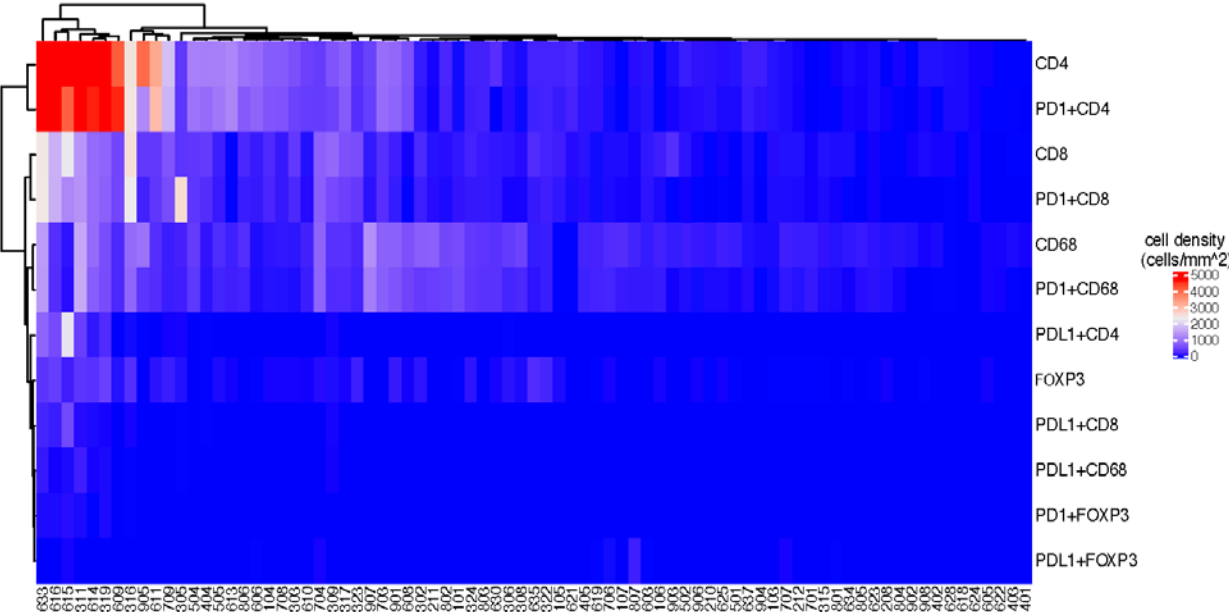

## B) Tumor compartment

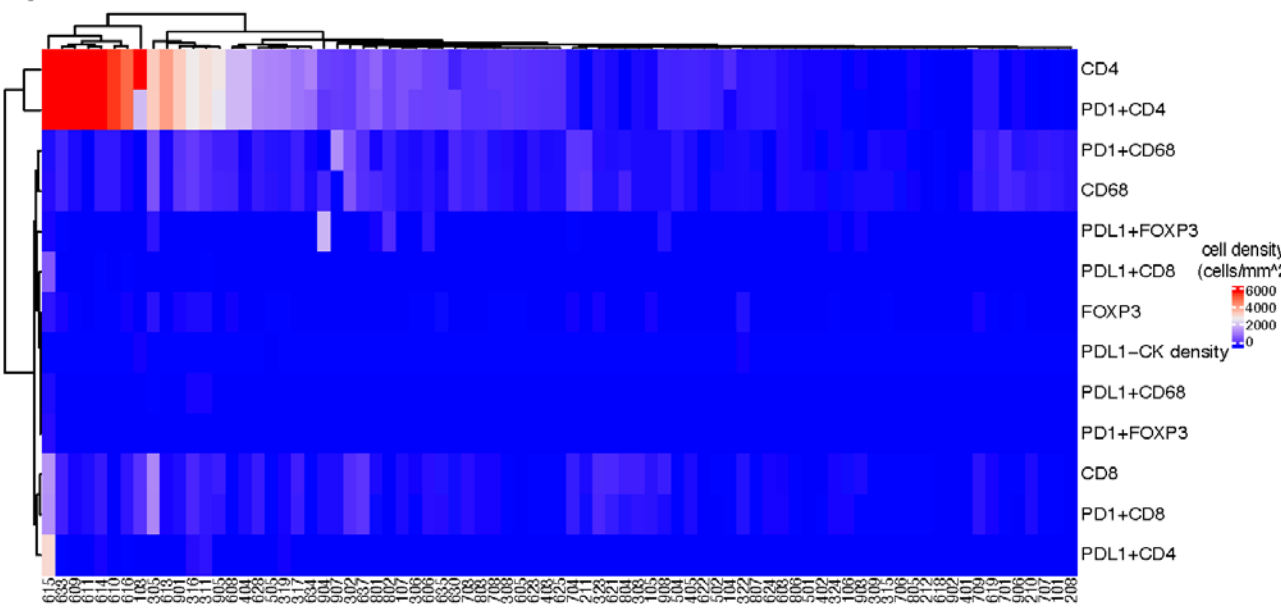

# Supplementary Figure 3

**a**

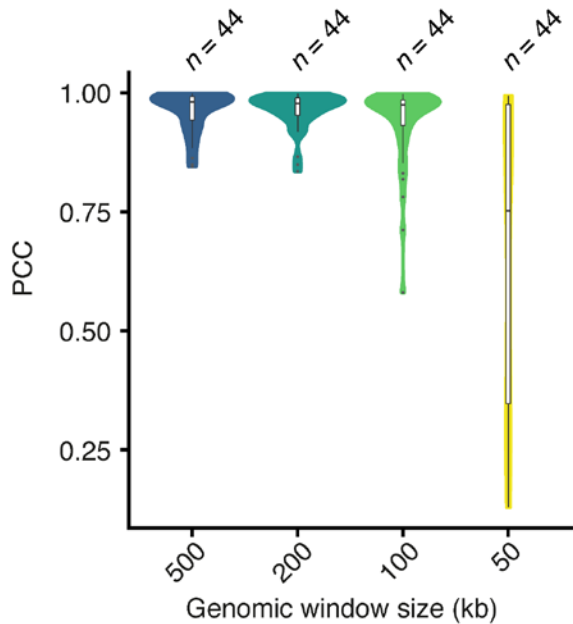

**b**

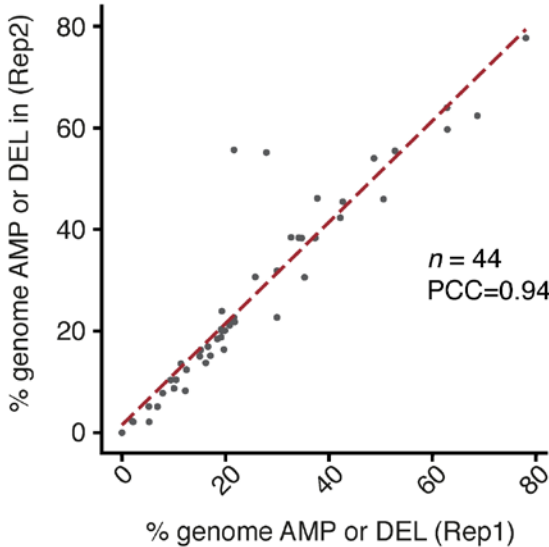

**c**

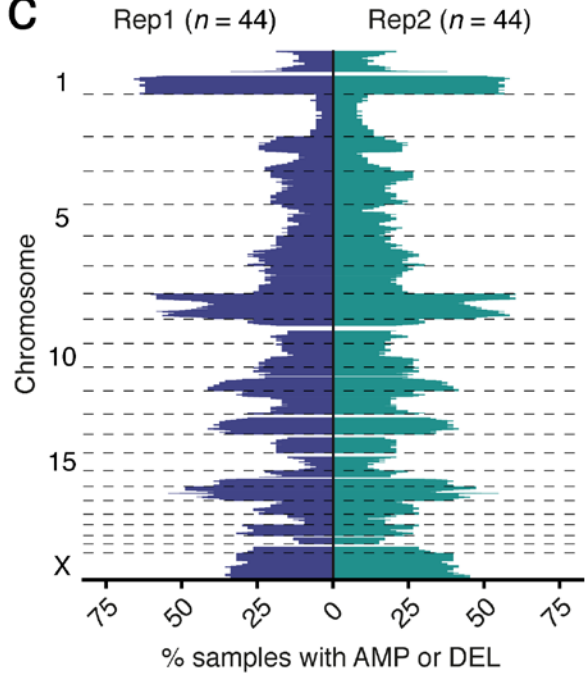

# Supplementary Figure 4

## A

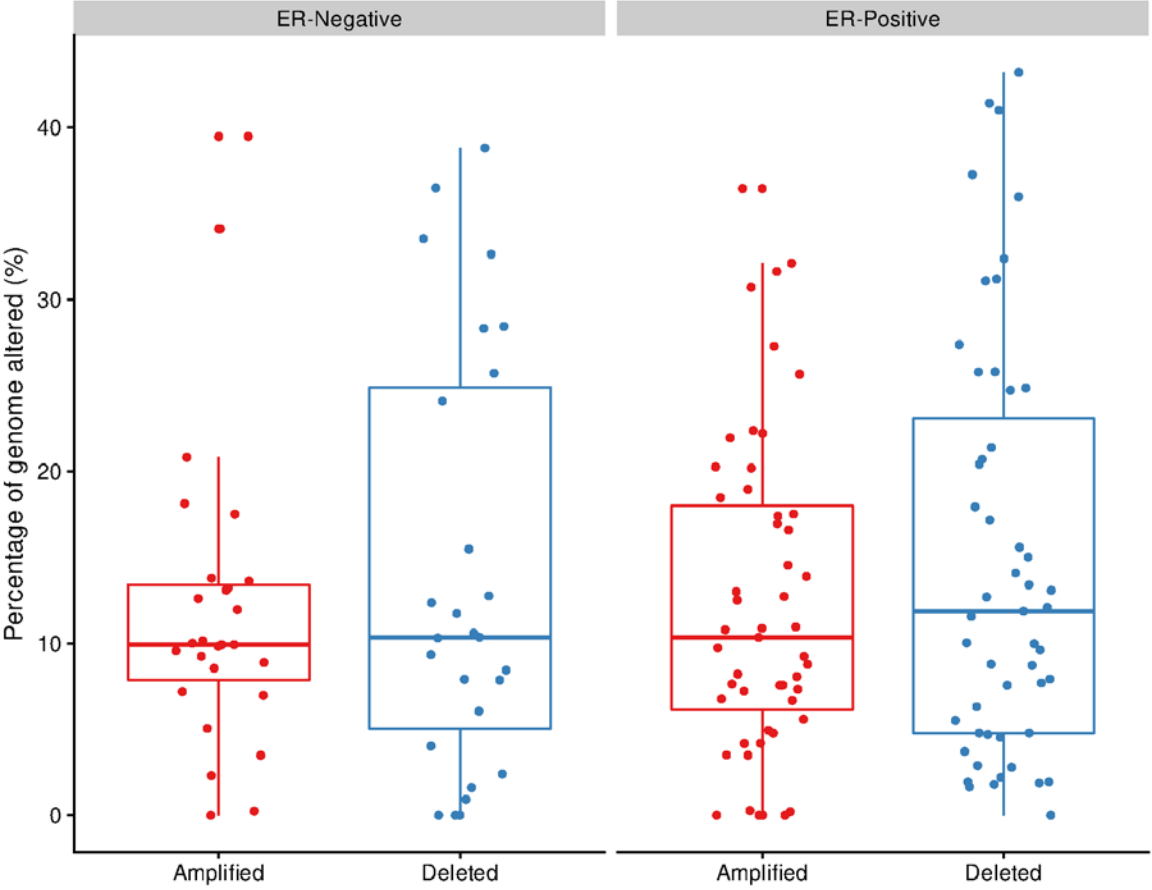

## B

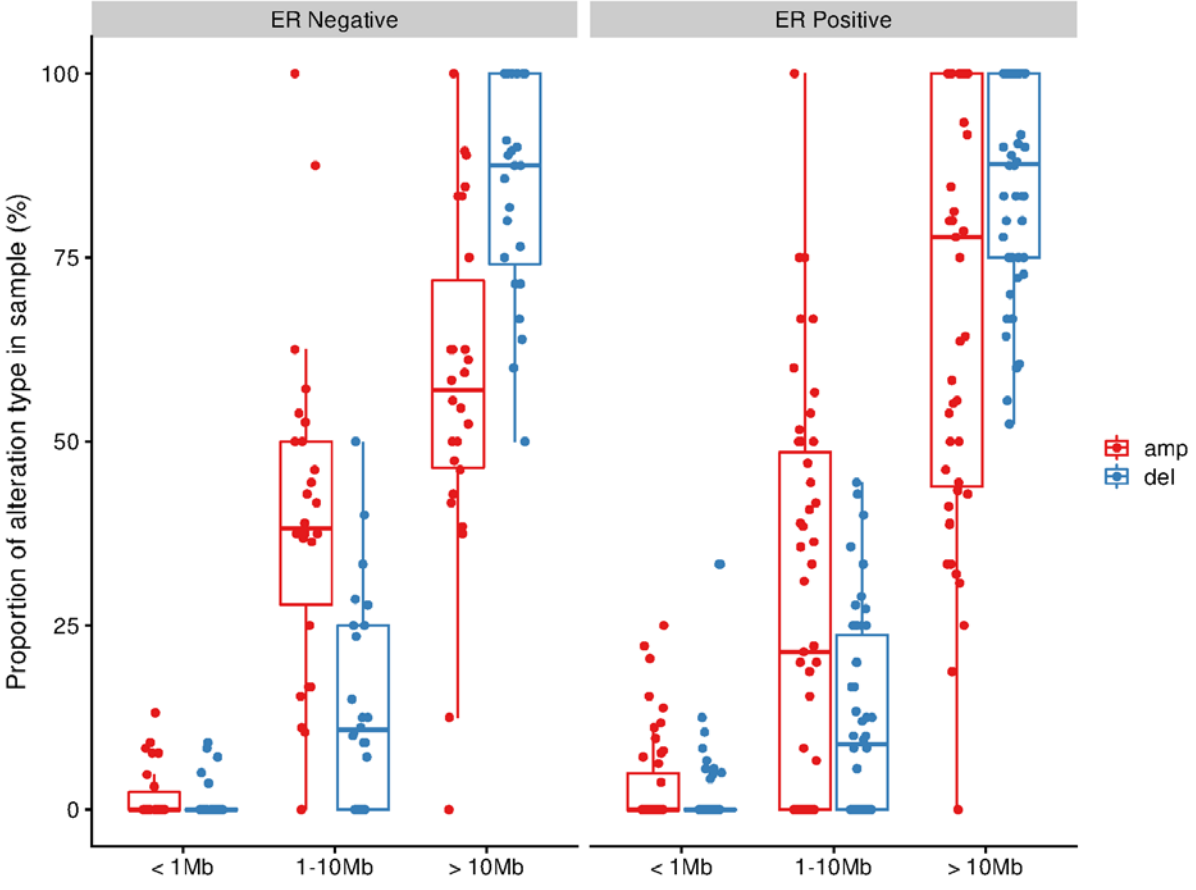

**Supplementary Table 1.** Cell densities (cells/mm<sup>2</sup>) of the different immune cell subsets as derived from the multiplex fluorescent IHC method (n=79)

| <b>Cell type</b>                 | <b>Median</b> | <b>Mean</b> | <b>SD</b> | <b>p-value<sup>§</sup></b> |
|----------------------------------|---------------|-------------|-----------|----------------------------|
| <b><i>CD4+ cells</i></b>         |               |             |           |                            |
| intra-tumoral                    | 271           | 1104        | 1967      | 0.4541                     |
| stromal                          | 141.8         | 909         | 1860      |                            |
| <b><i>CD8+ cells</i></b>         |               |             |           |                            |
| intra-tumoral                    | 23.87         | 91.46       | 228.2     | <0.0001 ****               |
| stromal                          | 81.3          | 278.8       | 510.9     |                            |
| <b><i>CD68+ cells</i></b>        |               |             |           |                            |
| intra-tumoral                    | 59.32         | 114.2       | 136.1     | <0.0001 ****               |
| stromal                          | 146.9         | 278.3       | 329.1     |                            |
| <b><i>FOXP3+ cells</i></b>       |               |             |           |                            |
| intra-tumoral                    | 0             | 6.9         | 16.84     | <0.0001 ****               |
| stromal                          | 0             | 49.56       | 95.97     |                            |
| <b><i>PD-1+CD4+ cells</i></b>    |               |             |           |                            |
| intra-tumoral                    | 285.8         | 976.4       | 1606      | 0.0432 *                   |
| stromal                          | 86.87         | 779.6       | 1649      |                            |
| <b><i>PD-1+CD8+ cells</i></b>    |               |             |           |                            |
| intra-tumoral                    | 22.28         | 83.8        | 222.7     | <0.0001 ****               |
| stromal                          | 40.27         | 254.8       | 522.2     |                            |
| <b><i>PD-1+CD68+ cells</i></b>   |               |             |           |                            |
| intra-tumoral                    | 52.44         | 117         | 197.1     | <0.0001 ****               |
| stromal                          | 112.6         | 217.5       | 302.1     |                            |
| <b><i>PD-1+FOXP3+ cells</i></b>  |               |             |           |                            |
| intra-tumoral                    | 0             | 0.75        | 6.2       | 0.0195                     |
| stromal                          | 0             | 2.3         | 8.8       | *                          |
| <b><i>PD-L1+CD4+ cells</i></b>   |               |             |           |                            |
| intra-tumoral                    | 0             | 38.52       | 320.5     | 0.0080 **                  |
| stromal                          | 0             | 55.25       | 269.1     |                            |
| <b><i>PD-L1+CD8+ cells</i></b>   |               |             |           |                            |
| intra-tumoral                    | 0             | 9.58        | 83.94     | 0.0840                     |
| stromal                          | 0             | 12.45       | 63.07     |                            |
| <b><i>PD-L1+CD68+ cells</i></b>  |               |             |           |                            |
| intra-tumoral                    | 0             | 1.25        | 5.63      | 0.0923                     |
| stromal                          | 0             | 4.87        | 21.37     |                            |
| <b><i>PD-L1+FOXP3+ cells</i></b> |               |             |           |                            |
| intra-tumoral                    | 0             | 31.55       | 212.3     | 0.2221                     |
| stromal                          | 0             | 2.88        | 16.22     |                            |

<sup>§</sup>Wilcoxon sign-rank test



**Supplementary Table 3.** Patient characteristics per manual TILs group (median cut-off)

|                                                   | <b>Study cohort</b> | <b>High TILs</b>   | <b>Low TILs</b>    | <b>P value</b>     |
|---------------------------------------------------|---------------------|--------------------|--------------------|--------------------|
|                                                   | <b>N = 89 (%)</b>   | <b>N = 43 (%)</b>  | <b>N = 46 (%)</b>  |                    |
| <b>Age</b><br>Median (min – max)                  | 51.1 (28.7 – 64.7)  | 50.8 (31.0 – 64.2) | 51.8 (28.7 – 64.7) | 0.895*             |
| <b>Tumor Size mm</b><br>Median (min – max)        | 24 (2 – 150)        | 21 (2 – 121)       | 27.50 (9 – 150)    | 0.264*             |
| <b>Positive lymph nodes</b><br>Median (min – max) | 6 (1 – 35)          | 5 (1 – 35)         | 7.5 (1 – 16)       | 0.581*             |
| <b>Grade</b>                                      |                     |                    |                    |                    |
| 1                                                 | 11 (12.4)           | 2 (4.7)            | 9 (19.6)           | <b>&lt;0.001**</b> |
| 2                                                 | 31 (34.8)           | 9 (20.9)           | 22 (47.8)          |                    |
| 3                                                 | 47 (52.8)           | 32 (74.4)          | 15 (32.6)          |                    |
| <b>Estrogen Receptor</b>                          |                     |                    |                    |                    |
| Positive                                          | 57 (64.0)           | 18 (41.9)          | 39 (84.8)          | <b>&lt;0.001**</b> |
| Negative                                          | 32 (36.0)           | 25 (58.1)          | 7 (15.2)           |                    |
| <b>Progesterone Receptor</b>                      |                     |                    |                    |                    |
| Positive                                          | 40 (44.9)           | 15 (34.9)          | 25 (54.3)          | 0.065**            |
| Negative                                          | 49 (55.1)           | 28 (65.1)          | 21 (45.7)          |                    |
| <b>HER2</b>                                       |                     |                    |                    |                    |
| Positive                                          | 27 (30.3)           | 14 (32.6)          | 13 (28.3)          | 0.203**            |
| Negative                                          | 60 (67.4)           | 28 (65.1)          | 32 (69.6)          |                    |
| Unknown                                           | 2 (2.2)             | 1 (2.3)            | 1 (2.2)            |                    |

\* Mann Whitney U test

\*\* Pearson's  $\chi^2$



**Supplementary Table 4.** Definition of variables derived from digital tumor- infiltrating lymphocytes (TILs) evaluation

| <b>Variable</b>                                      | <b>Definition</b>                                                                                          |
|------------------------------------------------------|------------------------------------------------------------------------------------------------------------|
| <b>eTILs%</b>                                        | 100* TILs/Sum of Tumor Cells and TILs                                                                      |
| <b>etTILs%</b><br>( <i>total</i> )                   | 100* TILs/ Sum of TILs, Tumor cells, fibroblast and others                                                 |
| <b>esTILs%</b><br>( <i>stromal</i> )                 | 100* TILs/Sum of TILs, fibroblast and others adjacent to tumor                                             |
| <b>eaTILs</b><br>( <i>cell density</i> )             | Sum of TILs/Sum of areas of tumor region analyzed ( <b>mm<sup>2</sup></b> )                                |
| <b>easTILs%</b>                                      | TILs Cell Area /Stroma Area*100                                                                            |
| <b>Manual/visual stromal TILs</b><br>( <i>sTIL</i> ) | The percentage (%) of tumour stroma covered by infiltrating lymphocytes (International TILs Working Group) |

**Supplementary Table 5.** List of antibodies used for the multiplex fluorescent IHC method

| <b>Order</b> | <b>Antigen retrieval*</b> | <b>Marker</b> | <b>Clone</b> | <b>Host Species</b> | <b>Dilution</b> | <b>Company</b> |
|--------------|---------------------------|---------------|--------------|---------------------|-----------------|----------------|
| 1.           | pH9                       | CD68          | PG-M1        | Mouse               | 1:400           | Agilent        |
| 2.           | pH6                       | PD-1          | NAT105       | Mouse               | 1:100           | Abcam          |
| 3.           | pH6                       | CD4           | 4B12         | Mouse               | 1:100           | Agilent        |
| 4.           | pH6                       | CD8a          | C8/144B      | Mouse               | 1:200           | Thermo Fisher  |
| 5.           | pH6                       | PD-L1         | SP142        | Rabbit              | 1:400           | Abcam          |
| 6.           | pH6                       | FoxP3         | D6O8R        | Rabbit              | 1:300           | Cell Signaling |
| 7.           | pH6                       | PanCK         | C-11         | Mouse               | 1:500           | Abcam          |
|              |                           | Cytokeratin   | AE1/AE3      | Mouse               | 1:400           | Dako           |
|              |                           | E-cahderin    | 36/E         | Mouse               | 1:2000          | BD Biosciences |
| 8.           | -                         | DAPI          | -            | -                   | -               | Perkin Elmer   |

\*Antigen retrieval performed in an automated Leica Bond RX<sup>m</sup> Research Stainer at 95 °C, 20min.

The ImmPRESS® HRP Anti-Mouse IgG (Peroxidase) (Cat. No: MP-7402-50) and Anti-Rabbit IgG (Peroxidase) Polymer Detection Kits, made in Horse (Cat No: MP-7401-50) (Vector Laboratories) were used as secondary antibodies
